# Supplementary material
Source: MDPI journal article supplement (https://www.mdpi.com/2311-7524/9/1/121)
Supplement: s1 [file s1 › horticulturae-2084520-supplementary.pdf]

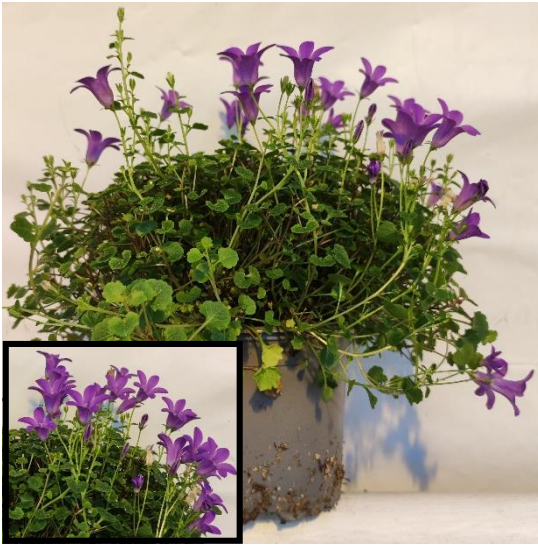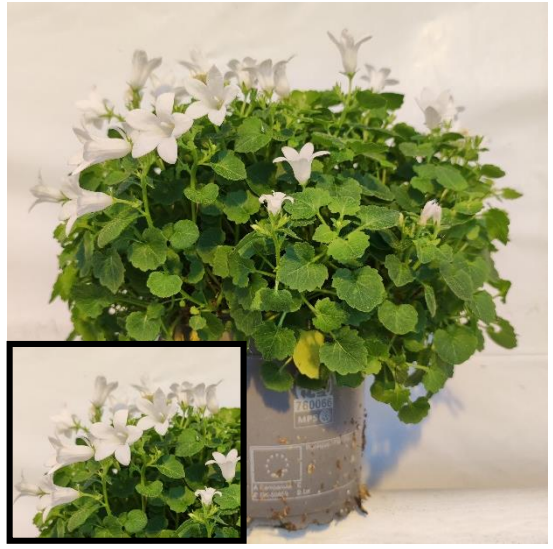

**Supplementary Figure S1.** Deep Blue Ocean and White Ocean genotypes pictures showing the colour of the petals.

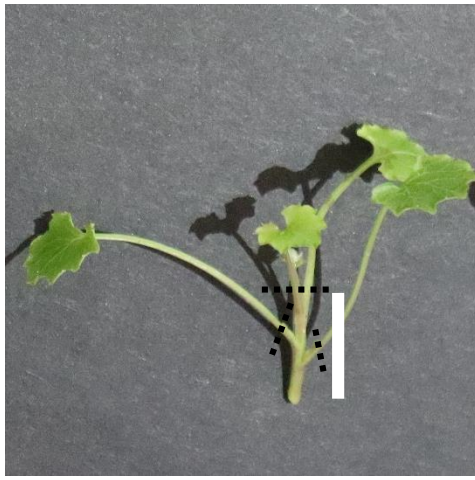

**Supplementary Figure S2.** Illustration of how the 1 cm segment of the basal cut site was collected. Bar scale in white: 1 cm. Dashed lines represent the cuttings made.

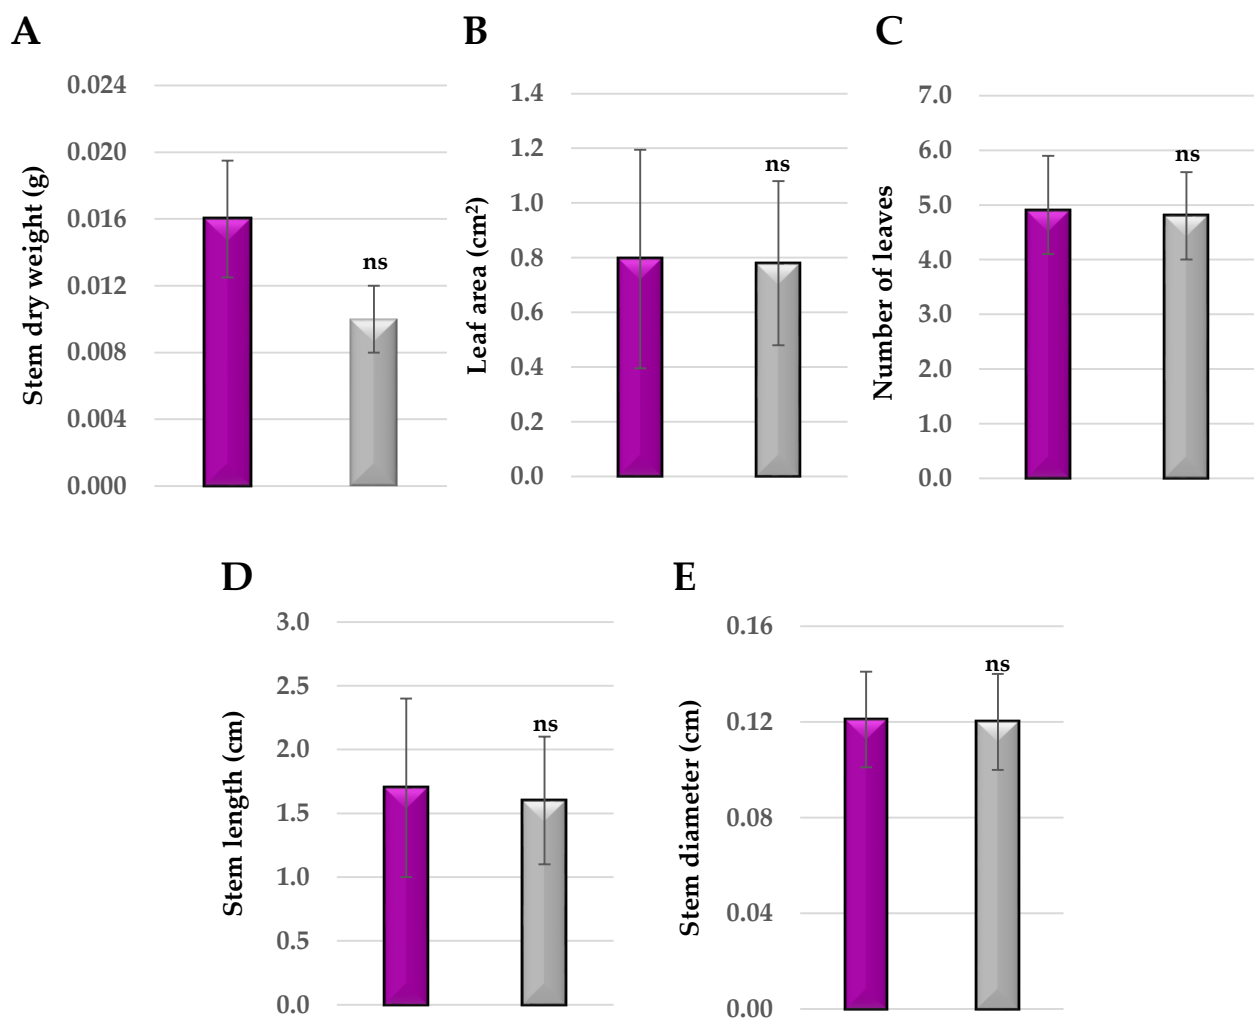

**Supplementary Figure S3.** Stem biomass accumulation and morphological analysis at Deep Blue Ocean (DBO) and White Ocean (WhO) *Campanula portenschlagiana* genotypes. A) Average dry stem weight of DBO (dark purple columns) and WhO (light gray columns) at the twenty-first day after cutting. B) Average leaf area of DBO and WhO. C) Average number of leaves of DBO (dark purple box) and WhO (light gray box). D) Average stem length (cm) of the adventitious root of DBO (dark purple box) and WhO (light gray box). E) Average stem diameter (cm) of DBO and WhO at the twenty-first day after cutting. Error bars represent standard deviation. *t*-test significance: ns = no significance, *n* = 20.

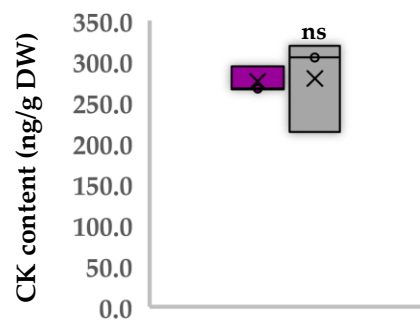

**Supplementary Figure S4.** Trans-zeatin quantification in Deep Blue Ocean (dark purple box) and White Ocean (light gray box) *Campanula portenschlagiana* genotypes. CK: Trans-zeatin;  $t$ -test: ns = no significance,  $n = 3$ . The data for CK composition were previously presented at the 1st International Electronic Conference on Horticulture [29].

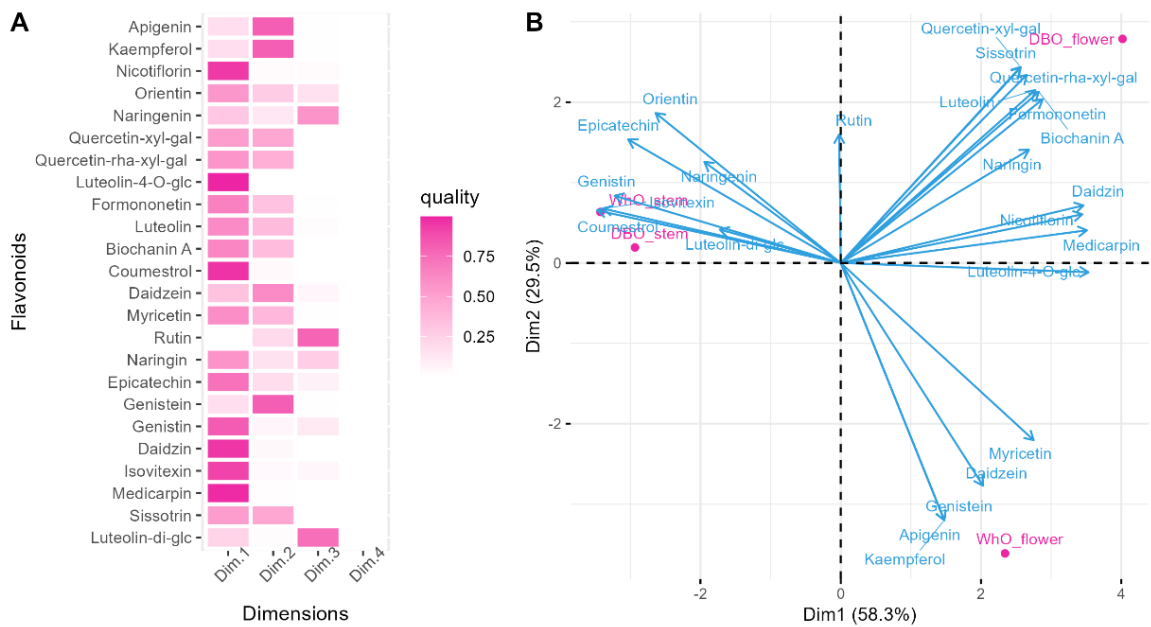

**Supplementary Figure S5.** Principal component analysis (PCA) of flavonoids in the cut stems and petals of Deep Blue Ocean (DBO) and White Ocean (WhO) *Campanula portenschlagiana* genotypes. A) List of the 24 compounds and four-dimensional reduction analysis. B) PCA score plot. Dim: dimension.
